# Supplementary material for: Lightning as a major driver of recent large fire years in North American boreal forests
Source: Springer Nature journal article supplement (doi:10.1038/nclimate3329), 2017-06-26
Supplement: 41558_2017_BFnclimate3329_MOESM1_ESM.pdf [file 41558_2017_BFnclimate3329_MOESM1_ESM.pdf]

In the format provided by the authors and unedited.

# Lightning as a major driver of recent large fire years in North American boreal forests

Sander Veraverbeke<sup>1,2\*</sup>, Brendan M. Rogers<sup>3</sup>, Mike L. Goulden<sup>1</sup>, Randi R. Jandt<sup>4</sup>, Charles E. Miller<sup>5</sup>, Elizabeth B. Wiggins<sup>1</sup> and James T. Randerson<sup>1</sup>

---

<sup>1</sup>Department of Earth System Science, University of California, Irvine, California 92697, USA. <sup>2</sup>Faculty of Earth and Life Sciences, Vrije Universiteit Amsterdam, 1081 HV Amsterdam, North Holland, The Netherlands. <sup>3</sup>Woods Hole Research Center, Falmouth, Massachusetts 02540, USA. <sup>4</sup>Alaska Fire Science Consortium, University of Alaska, Fairbanks, Alaska 99775, USA. <sup>5</sup>NASA Jet Propulsion Laboratory, California Institute of Technology, Pasadena, California 91109, USA. \*e-mail: [s.s.n.veraverbeke@vu.nl](mailto:s.s.n.veraverbeke@vu.nl)

Supplementary figures

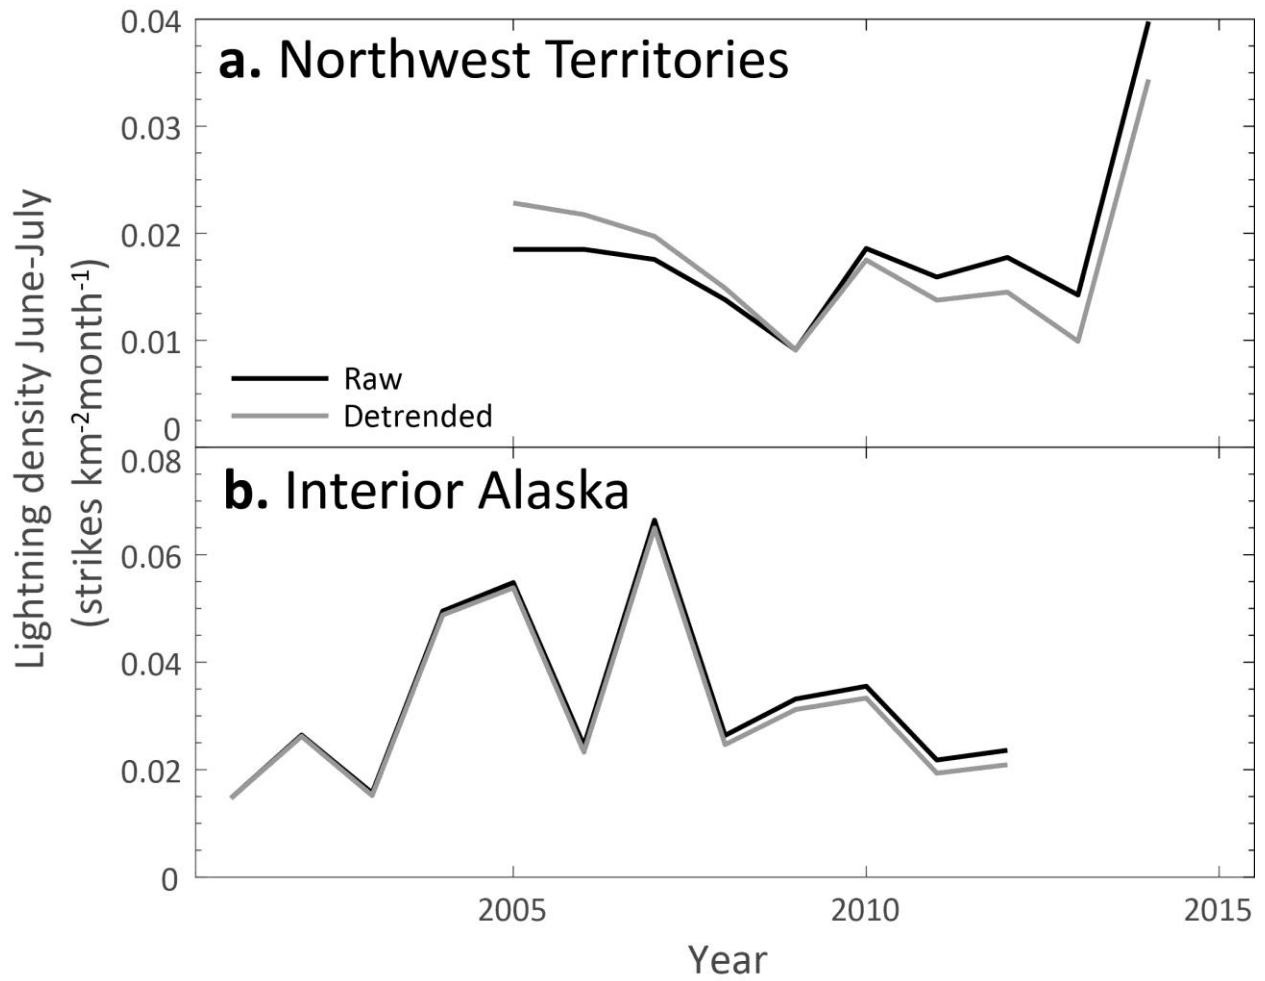

Supplementary Figure 1. Raw (observed) and detrended lightning density for (a) the Northwest Territories and (b) Interior Alaska.

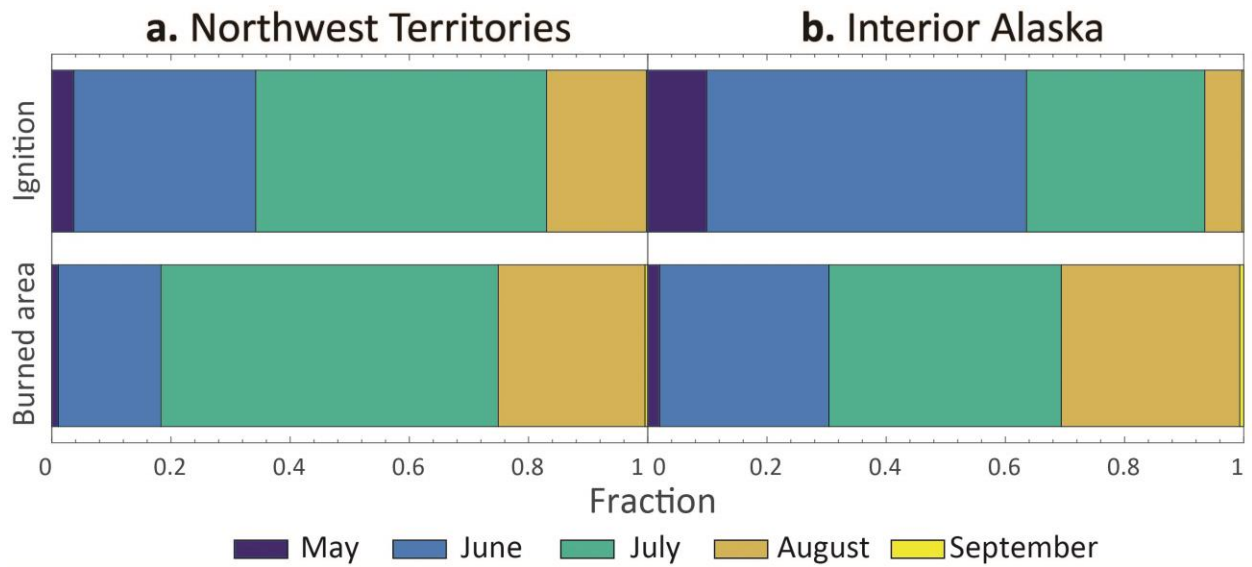

**Supplementary Figure 2. Fraction of ignition and burned area per month in (a) the Northwest Territories and (b) Interior Alaska between 2001 and 2015. Only ignitions and burned area from lightning ignitions were considered.**

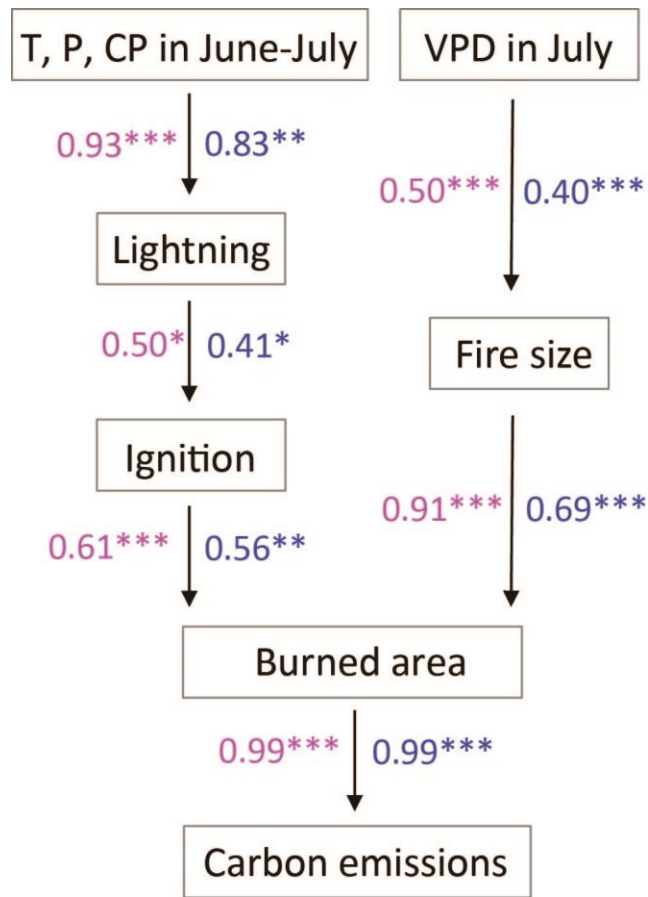

Magenta: Northwest Territories  
 Blue: Interior Alaska

**Supplementary Figure 3. Key statistical relationships found for the cascade from meteorology to carbon emissions for the Northwest Territories and Interior Alaska between 2001 and 2015.** The numbers displayed represent  $R^2$  values (\*\*\*) denotes significant relationships at a level of  $p < 0.001$ , \*\* at a level of  $p < 0.01$ , and \* at a level of  $p < 0.05$ ). (T: temperature, P: precipitation, CP: convective precipitation, VPD: vapor pressure deficit).

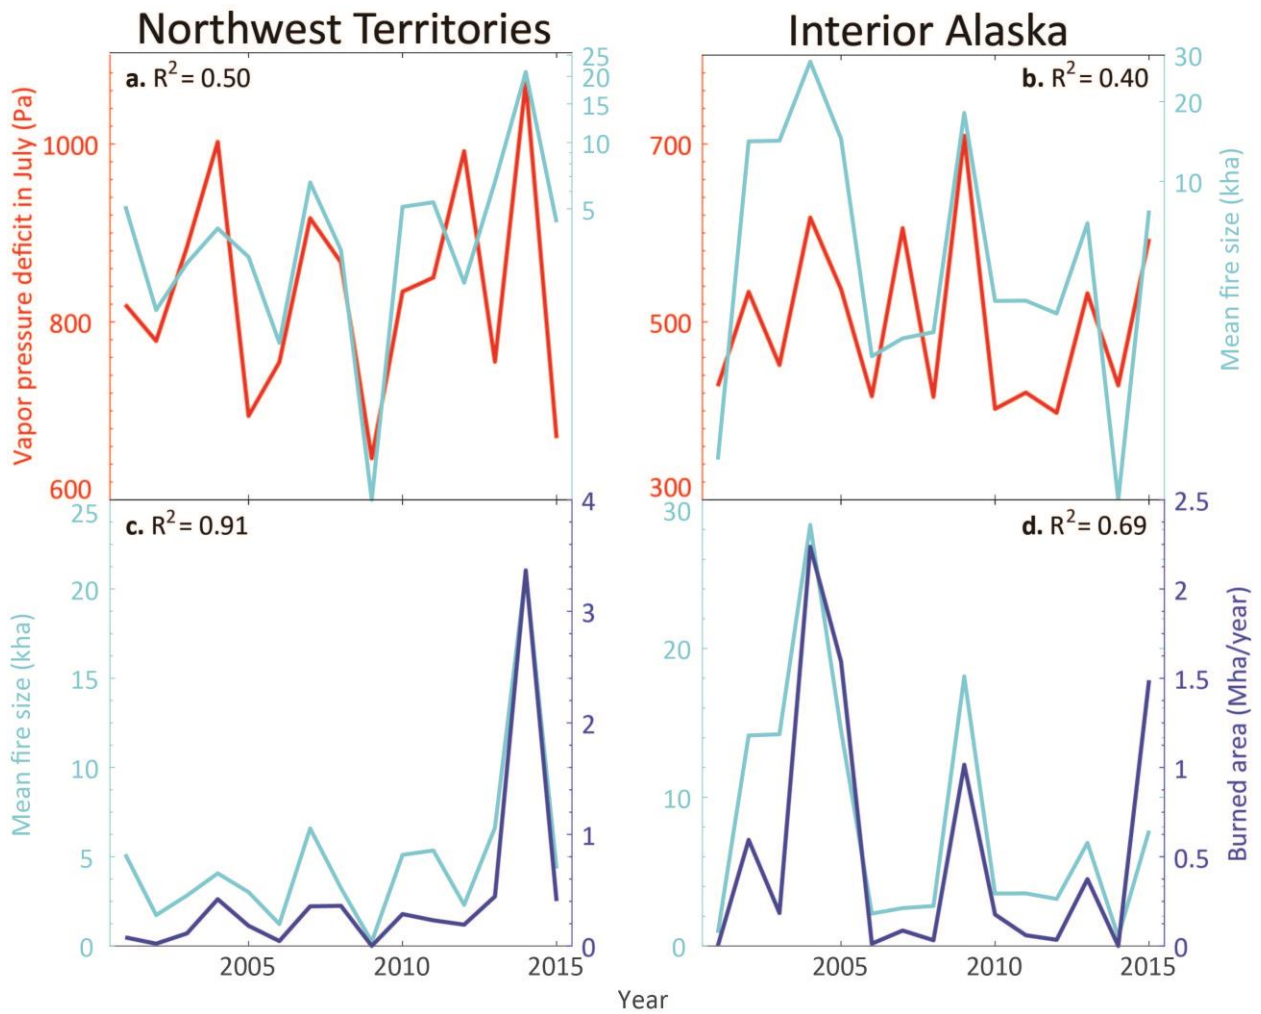

**Supplementary Figure 4. Interannual relationships from 2001 to 2015 between (a, b) July vapor pressure deficit and mean fire size, and (c, d) mean fire size and burned area in the Northwest Territories and Interior Alaska. Only lightning fires were considered.**

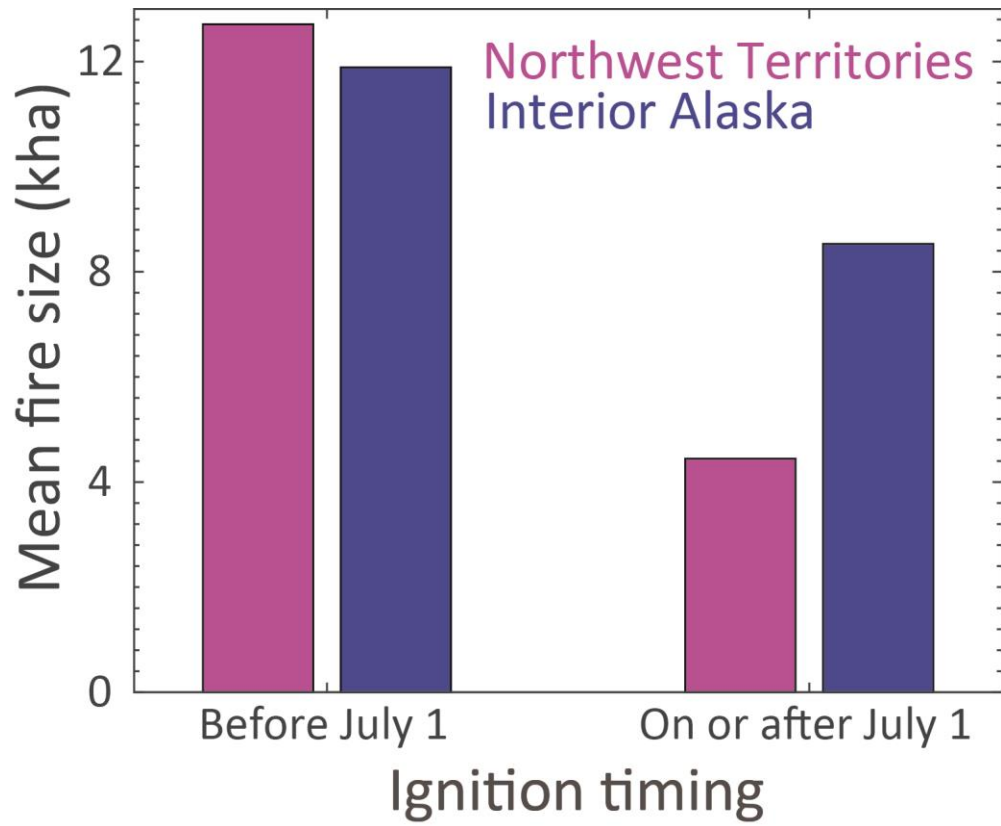

**Supplementary Figure 5. Mean fire size in the Northwest Territories and Interior Alaska between 2001 and 2015 as a function of ignition timing.** Only lightning fires were considered.

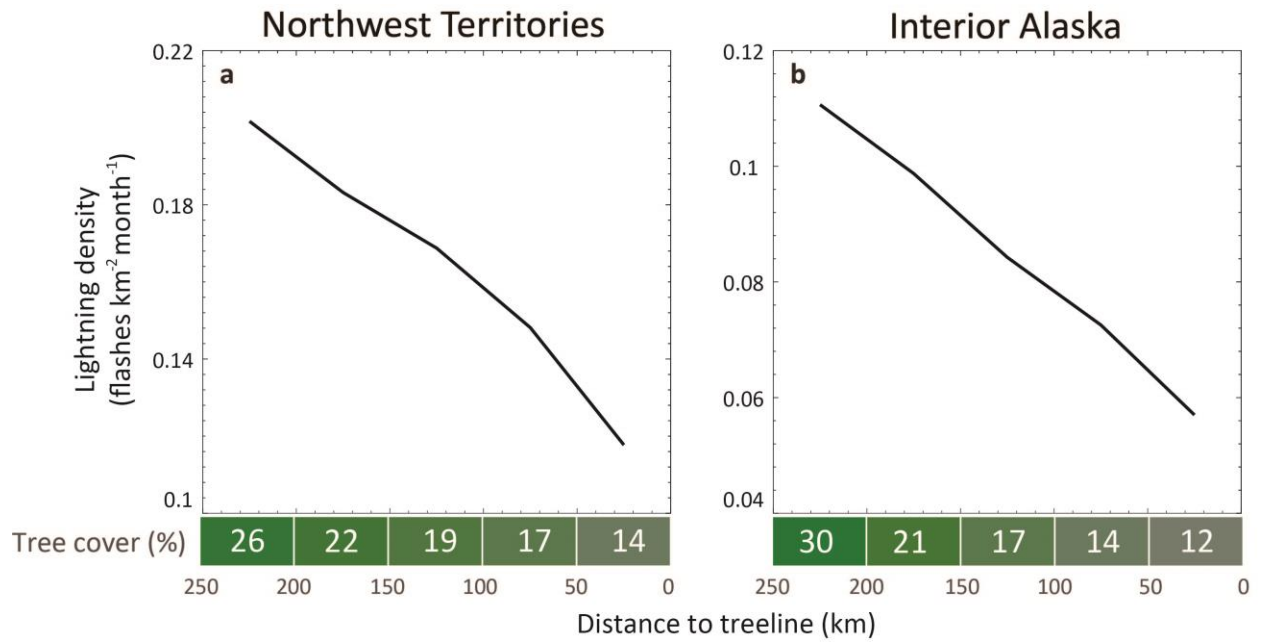

**Supplementary Figure 6. Decreases in lightning in June-July in the treeline ecotone for (a) the Northwest Territories, and (b) Interior Alaska.** Intra-cloud and cloud-to-ground lightning flash climatology was derived for June between 1995 and 1999 from the spaceborne Optical Transient Detector.

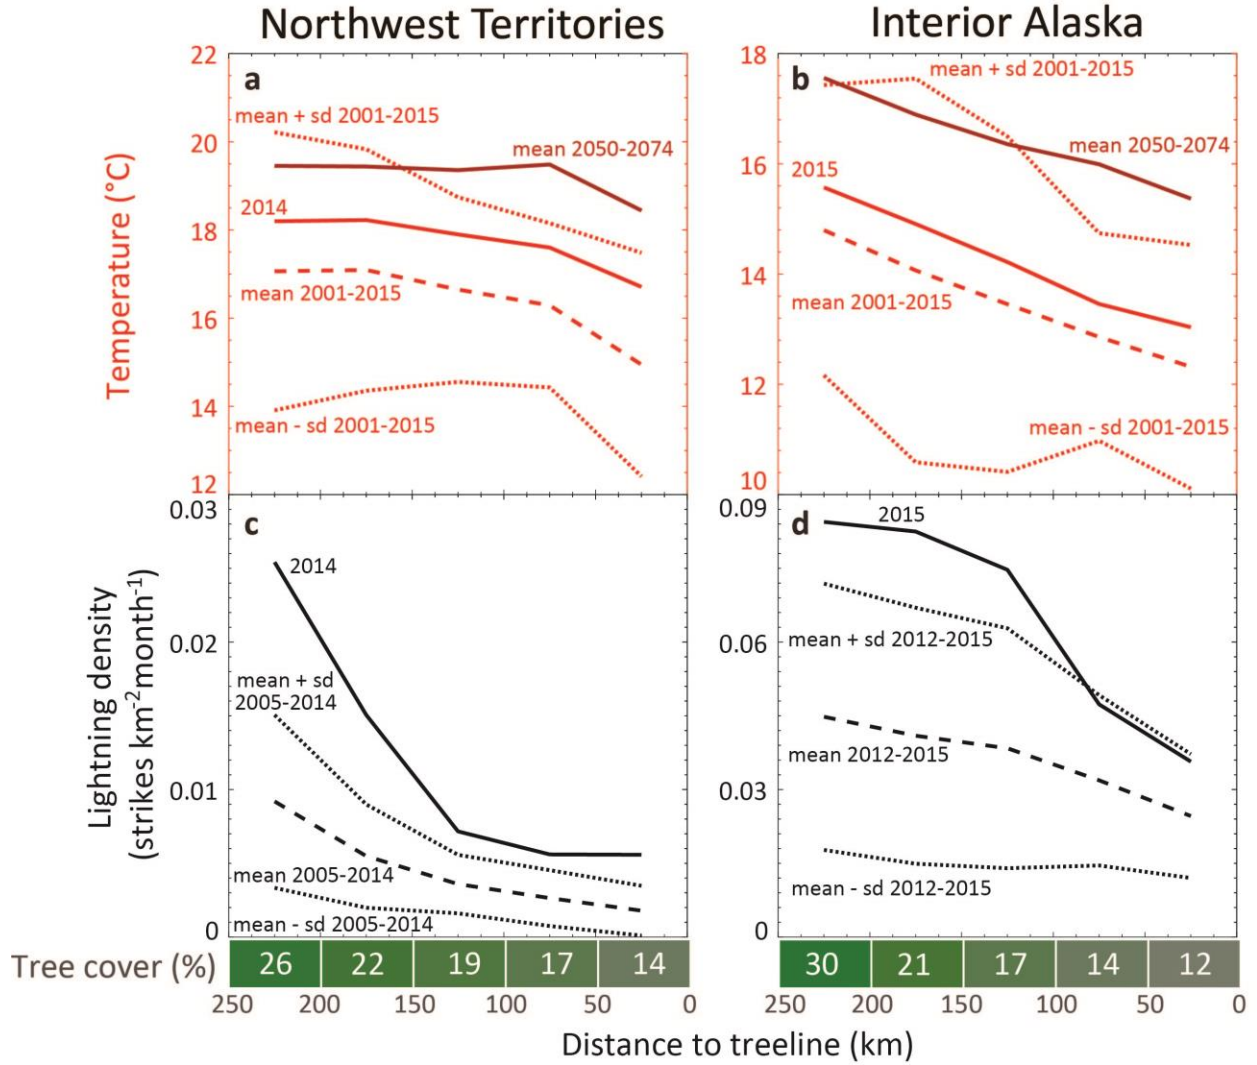

**Supplementary Figure 7. The extreme fire years in the Northwest Territories and Interior Alaska were characterized by above-average (a, b) temperature and (c, d) lightning along the treeline ecotone. Future temperature is also predicted to increase. (sd: standard deviation)**



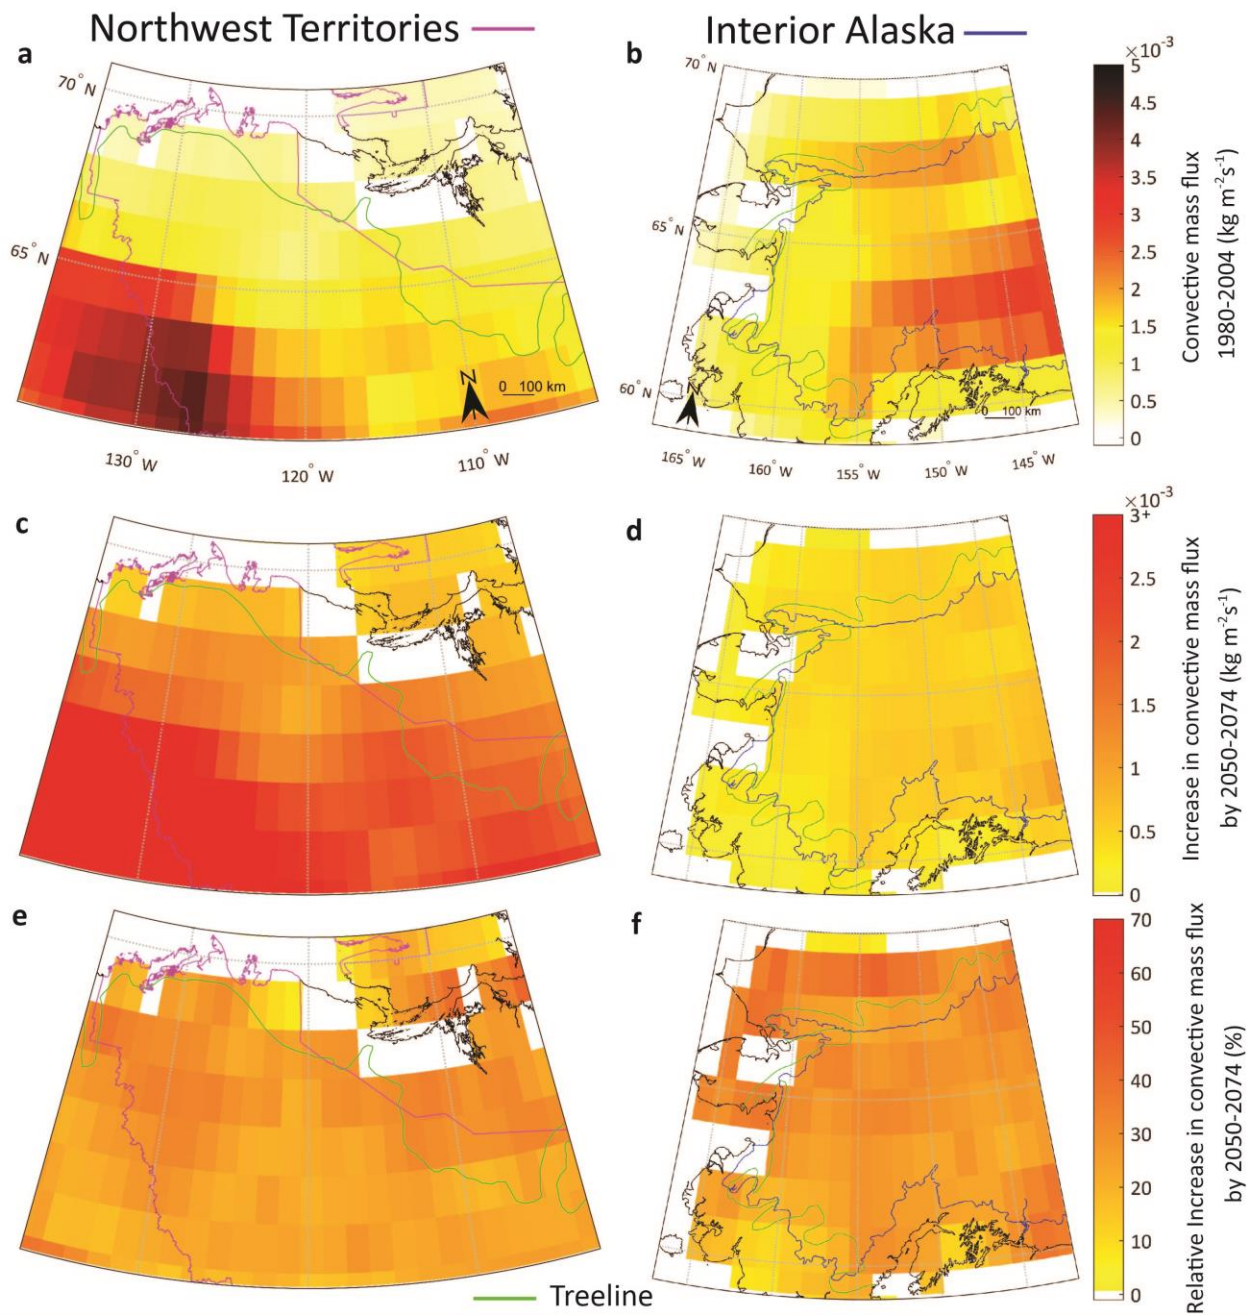

Supplementary Figure 8. Convective mass flux, a strong lightning predictor<sup>30</sup>, in June-July in 1980-2004, and absolute and relative increase in convective mass flux by 2050-2074 for (a, c, e) the Northwest Territories, and (b, d, f) Interior Alaska.

## Supplementary table

**Supplementary Table 1. Adjusted  $R^2$  values ( $R_{adj}^2$ ) and corrected Akaike information criterion (AICc) of multiple linear regression models (with constant) for modeling interannual variability in lightning in the Northwest Territories (2005-2014) and Interior Alaska (2001-2012).** (\*\* denotes significant regression models at a level of  $p < 0.01$ , and \* at a level of  $p < 0.05$ ). (CAPE: convective available potential energy, T: temperature, P: precipitation, CP: convective precipitation)

| Predictor variables | Northwest Territories |        | Interior Alaska |        |
|---------------------|-----------------------|--------|-----------------|--------|
|                     | $R_{adj}^2$           | AICc   | $R_{adj}^2$     | AICc   |
| CAPE                | -0.13                 | -53.22 | 0.5*            | -53.50 |
| T                   | -0.07                 | -53.69 | 0.51*           | -55.69 |
| P                   | 0.41*                 | -59.71 | -0.10           | -46.03 |
| CP                  | -0.05                 | -53.95 | 0.21            | -49.99 |
| $CAPE \times P$     | 0.17                  | -56.27 | 0.34*           | -52.16 |
| $CAPE \times CP$    | -0.11                 | -55.09 | 0.52**          | -55.96 |
| $CAPE \times T$     | 0.13                  | -48.89 | 0.50**          | -55.40 |
| $T \times P$        | 0.47*                 | -60.73 | 0.04            | -47.72 |
| $T \times CP$       | -0.10                 | -53.42 | 0.49**          | -55.20 |
| $P \times CP$       | 0.04                  | -47.65 | 0               | -47.17 |
| CAPE, P             | 0.33                  | -56.44 | 0.47*           | -53.27 |
| CAPE, CP            | 0.09                  | -50.82 | 0.47*           | -53.36 |
| CAPE, T             | 0.10                  | -53.51 | 0.52*           | -54.49 |
| T, P                | 0.37                  | -61.10 | 0.50*           | -54.04 |
| T, CP               | -0.02                 | -52.22 | 0.65**          | -58.35 |
| P, CP               | 0.65*                 | -62.98 | 0.71**          | -60.68 |
| CAPE, T, P          | 0.43                  | -54.62 | 0.46*           | -50.86 |
| CAPE, T, CP         | 0.08                  | -49.80 | 0.62*           | -55.05 |
| CAPE, P, CP         | 0.78**                | -64.19 | 0.71**          | -58.32 |
| T, P, CP            | 0.90**                | -72.22 | 0.76**          | -60.73 |
| CAPE, T, P, CP      | 0.91**                | -66.30 | 0.74*           | -55.91 |
